# Supplementary material for: The role of risk perception and affect in predicting support for conservation policy under rapid ecosystem change
Source: PubMed Central journal article supplement (PMC7116843; doi:10.1111/csp2.316), 2020-11-11
Supplement: EMS116186-supplement-Questionnaire.pdf [file EMS116186-supplement-Questionnaire.pdf]

I am a researcher from the University of Kent and I am conducting a study concerning how people on Islay view geese. So that we collect data from as many people as possible, I would be grateful if you would take time to complete this questionnaire. Anonymised data from this study will be useful in discussions of goose management strategies and will be used to write a scientific publication. Before you decide to participate, please could you confirm if you consent to completing this questionnaire and the use of your response for the above purposes?

|                            |                          |          |                          |       |                      |
|----------------------------|--------------------------|----------|--------------------------|-------|----------------------|
| Agree <i>(please tick)</i> | <input type="checkbox"/> | Disagree | <input type="checkbox"/> | Date: | <input type="text"/> |
|----------------------------|--------------------------|----------|--------------------------|-------|----------------------|

| About your farm: |                                                                                                                  | Hectares |
|------------------|------------------------------------------------------------------------------------------------------------------|----------|
| 1                | Total size of farm                                                                                               |          |
| 2                | Area of improved grassland (i.e. grassland reseeded in the last 7 years)                                         |          |
| 3                | Area used for rotational arable cropping                                                                         |          |
| 4                | Area permanent pasture (pasture 8 years or older)                                                                |          |
| 5                | Other <i>(please specify type &amp; size)</i><br><i>Note: sum of land uses should equal 'Total size of farm'</i> |          |

| LIVESTOCK |                                                                          | Quantity <i>(enter quantity e.g. 0, 1, 2...)</i> |
|-----------|--------------------------------------------------------------------------|--------------------------------------------------|
| 6         | How many beef cattle do you currently stock?                             |                                                  |
| 7         | How many sheep do you currently stock?                                   |                                                  |
| 8         | Other livestock <i>(specify type &amp; quantity)</i>                     |                                                  |
| 9         | What year did you start receiving goose payments? <i>(provide year):</i> |                                                  |

|    |                                                                                                          |                                   |
|----|----------------------------------------------------------------------------------------------------------|-----------------------------------|
| 10 | What is your year of birth <i>(e.g. 1974)</i>                                                            |                                   |
| 11 | What is your gender? <i>(Circle one)</i>                                                                 | Male                  Female      |
| 12 | Which of the following best describes your situation with this farm? <i>(Circle one)</i><br>Other: _____ | Owner<br>Tenant farmer<br>Crofter |
| 13 | How long have you managed this farm for? <i>(In years)</i>                                               |                                   |
| 14 | How long have you been farming for in total? <i>(In years)</i>                                           |                                   |

I would now like to present some **scenarios** to you about the future of farming and barnacle goose management on Islay. I'm going to ask you to report your level of support for the scenario using this scale *[show 'scenario' scale]*

### Scenario A

Over a 10 year period goose damage will be reduced by 25-35%. This will be achieved by shooting 25-30% of the barnacle geese on Islay over 10 years. Goose payments will remain the same. Subsidies and average prices of agricultural goods (both purchased and sold) will remain at today's levels, although some small variation can be expected between years.

| A | Please indicate your level of support for the above scenario: <i>(please circle one)</i> |              |                                    |            |                     |
|---|------------------------------------------------------------------------------------------|--------------|------------------------------------|------------|---------------------|
|   | Very unsupportive                                                                        | Unsupportive | Neither supportive or unsupportive | Supportive | Strongly supportive |

Why did you give this answer? \_\_\_\_\_  
 \_\_\_\_\_  
 \_\_\_\_\_

**Scenario B**

Over a \_\_\_\_ year period goose damage will be reduced by \_\_\_\_ - \_\_\_\_%. This will be achieved by shooting \_\_\_\_ - \_\_\_\_% of the barnacle geese on Islay over \_\_\_\_ years. Goose payments will remain the same. Subsidies and average prices of agricultural goods (both purchased and sold) will remain at today's levels, although some small variation can be expected between years.

|                   |                                                                                          |                                    |            |                     |
|-------------------|------------------------------------------------------------------------------------------|------------------------------------|------------|---------------------|
| <b>B</b>          | Please indicate your level of support for the above scenario: <i>(please circle one)</i> |                                    |            |                     |
| Very unsupportive | Unsupportive                                                                             | Neither supportive or unsupportive | Supportive | Strongly supportive |

Why did you give this answer? \_\_\_\_\_  
 \_\_\_\_\_  
 \_\_\_\_\_

**Scenario C**

Over a 10 year period you and other Islay farmers double the number of sheep you stock to approximately 2/ha. As a result, barnacle geese on Islay will move elsewhere, for example, to other islands and goose damage will be reduced by 25-35% without shooting geese. Goose payments will remain the same. Subsidies and average prices of agricultural goods (both purchased and sold) will remain at today's levels, although some small variation can be expected between years.

|                   |                                                                                          |                                    |            |                     |
|-------------------|------------------------------------------------------------------------------------------|------------------------------------|------------|---------------------|
| <b>C</b>          | Please indicate your level of support for the above scenario: <i>(please circle one)</i> |                                    |            |                     |
| Very unsupportive | Unsupportive                                                                             | Neither supportive or unsupportive | Supportive | Strongly supportive |

Why did you give this answer? \_\_\_\_\_  
 \_\_\_\_\_  
 \_\_\_\_\_

**Scenario D**

Over a 10 year period goose damage will be reduced by 25-35%. This will be achieved by shooting 25-30% of the barnacle geese on Islay over 10 years. Goose payments will reduce to half their current value due to funding cuts. Subsidies and average prices of agricultural goods (both purchased and sold) will remain at today's levels, although some small variation can be expected between years.

|                   |                                                                                          |                                    |            |                     |
|-------------------|------------------------------------------------------------------------------------------|------------------------------------|------------|---------------------|
| <b>D</b>          | Please indicate your level of support for the above scenario: <i>(please circle one)</i> |                                    |            |                     |
| Very unsupportive | Unsupportive                                                                             | Neither supportive or unsupportive | Supportive | Strongly supportive |

Why did you give this answer? \_\_\_\_\_  
 \_\_\_\_\_  
 \_\_\_\_\_



In general, how much trust do you have in the following organisation to make balanced decisions about land and wildlife management on Islay? I will first ask you about the national office of the organisation & then the local office.

|    |                                                               | TRUST SCALE |   |   |   |   |   |   |
|----|---------------------------------------------------------------|-------------|---|---|---|---|---|---|
|    |                                                               | 1           | 2 | 3 | 4 | 5 | 6 | 7 |
| 40 | National Farmers Union                                        |             |   |   |   |   |   |   |
| 41 | RSPB                                                          |             |   |   |   |   |   |   |
| 42 | Scottish Government, Rural Payments & Inspections Directorate |             |   |   |   |   |   |   |
| 43 | Scottish Natural Heritage (SNH)                               |             |   |   |   |   |   |   |

I am going to show you some more images and using two different scales, I would like you to rate each picture in terms of how it made you feel while viewing it [provide scales A & B].

|    | Image (A=Valence, B=Arousal)    | 1 | 2 | 3 | 4 | 5 | 6 | 7 | 8 | 9 |
|----|---------------------------------|---|---|---|---|---|---|---|---|---|
| 44 | WF improved grass land (A)      |   |   |   |   |   |   |   |   |   |
| 45 | WF improved grass land (B)      |   |   |   |   |   |   |   |   |   |
| 46 | Rat (A)                         |   |   |   |   |   |   |   |   |   |
| 47 | WF flock imp. Grassland (A)     |   |   |   |   |   |   |   |   |   |
| 48 | WF flock imp. Grassland (B)     |   |   |   |   |   |   |   |   |   |
| 49 | Sea (A)                         |   |   |   |   |   |   |   |   |   |
| 50 | WF natural habitat (A)          |   |   |   |   |   |   |   |   |   |
| 51 | WF natural habitat (B)          |   |   |   |   |   |   |   |   |   |
| 52 | Girl (A)                        |   |   |   |   |   |   |   |   |   |
| 53 | WF flock in natural habitat (A) |   |   |   |   |   |   |   |   |   |
| 54 | WF flock in natural habitat (B) |   |   |   |   |   |   |   |   |   |

|    | By what name do you know the bird shown in the image? (write name in full) |  |
|----|----------------------------------------------------------------------------|--|
| 55 | Image A                                                                    |  |
| 56 | Image B                                                                    |  |

|    | Thinking in terms of rough percentages (not actual amounts of cash), what proportion of your family income is derived from: | Estimated percentage (%) |
|----|-----------------------------------------------------------------------------------------------------------------------------|--------------------------|
| 57 | Farming activities                                                                                                          |                          |
| 58 | Conservation agreements (e.g. goose payments)                                                                               |                          |
| 59 | Letting of holiday accommodation                                                                                            | (If % go to 62)          |
| 60 | Off-farm employment                                                                                                         |                          |

|    | What percentage of your holiday lettings are accounted for by: | Estimated percentage (%) |
|----|----------------------------------------------------------------|--------------------------|
| 61 | Whisky tourists                                                |                          |
| 62 | Bird-watching/wildlife tourists                                |                          |
| 63 | Other 'general' tourists                                       |                          |

Do you mind if I record your address on this questionnaire? This would enable me to conduct spatial analyses, for example examining how distance from goose roosting sites affects you & your farming. I will never identify you or your farm when analysing and presenting the data.

Name & address (Optional):

|  |
|--|
|  |
|--|
