# Supplementary material for: The role of risk perception and affect in predicting support for conservation policy under rapid ecosystem change
Source: PubMed Central journal article supplement (PMC7116843; doi:10.1111/csp2.316), 2020-11-11
Supplement: EMS116186-supplement-Supporting_Information.pdf [file EMS116186-supplement-Supporting_Information.pdf]

## Supporting Information

F.A.V. St. John, Mason, T.H.E., Bunnefeld, N., *The role of risk perception and affect in predicting support for conservation policy under rapid ecosystem change*. Conservation Science and Practice.

Table S1 Images of barnacle geese and white fronted assessed by farmers using the valence and arousal scales. Positive valence, Happy, Pleased = 9; negative valence, Unhappy, Annoyed = 1. Positive arousal, Calm, Relaxed = 1; negative arousal, Agitated, Irritated = 9. Photographs were professionally printed, size 17.8 cm x 12.7 cm.

| <i>Branta leucopsis</i>                                                             | <i>Anser albifrons flavirostris</i>                                                 |                                      |
|-------------------------------------------------------------------------------------|-------------------------------------------------------------------------------------|--------------------------------------|
|    |    | Single goose on improved grassland   |
|   |   | Single goose on natural habitat      |
|  |  | Multiple geese on improved grassland |
|  |  | Multiple geese on natural habitat    |

Table S2 Mean (standard deviation) valence scores reported for six images from the IAPS library. Valence scores from our 60 study participants are presented next to those of 50 male college students reported in Lang et al. (2008). IAPS images cannot be printed in publications due to continued use in studies.

|                     | Mean (std dev) valence reported by farmers <sup>1</sup> | Mean (StDev) valence reported by 50 male American college students (Lang et al. 2008) <sup>1</sup> |
|---------------------|---------------------------------------------------------|----------------------------------------------------------------------------------------------------|
| IAPS 7045, zipper   | 5.51 (1.71)                                             | 5.14 (0.43)                                                                                        |
| IAPS 3220, hospital | 2.80 (1.80)                                             | 2.59 (1.28)                                                                                        |
| IAPS 2216, kids     | 8.29 (1.46)                                             | 7.12 (1.41)                                                                                        |
| IAPS 1280, rat      | 1.57 (1.33)                                             | 4.40 (1.70)                                                                                        |
| IAPS 5825, sea      | 8.33 (1.19)                                             | 8.08 (0.86)                                                                                        |
| IAPS 2411, girl     | 6.22 (2.05)                                             | 5.10 (0.80)                                                                                        |

<sup>1</sup>Positive valence, Happy, Pleased = 9; negative valence, Unhappy, Annoyed = 1.

Table S3 Farmer demographic and farm profile

| Description                                                | Value (SE)      |
|------------------------------------------------------------|-----------------|
| Sex                                                        | 88.3% males     |
| Mean age (n=58)                                            | 63 (1.6)        |
| Farm details (n=58):                                       |                 |
| Mean farm size                                             | 338.7 ha (56.4) |
| Mean area of improved grassland                            | 53.7 ha (5.7)   |
| Household income (n=55):                                   |                 |
| Mean percentage of household income derived from:          |                 |
| Farming                                                    | 46.2% (4.4)     |
| Off-farm employment                                        | 36.3% (4.8)     |
| Conservation payments                                      | 9.4% (1.6)      |
| Letting holiday accommodation                              | 8.1% (2.5)      |
| Percentage of farmers letting holiday accommodation (n=19) | 31.7%           |
| Mean percentage of household income derived from:          |                 |
| General tourism including game-shooting                    | 51.5% (7.8)     |
| Whiskey-related tourism                                    | 33.4% (6.6)     |
| Wildlife viewing tourism                                   | 15.2% (4.0)     |

Table S4 Spearman's rank correlations between risk, valence and arousal, and benefits, valence and arousal (n=59). Bold text indicates significance at 0.01 level; italic at 0.05 level.

| Item                        | Risk <sup>1</sup> :<br>Valence <sup>2</sup> | Risk:<br>Arousal <sup>3</sup> | Benefit <sup>4</sup> :<br>Valence | Benefit:<br>Arousal |
|-----------------------------|---------------------------------------------|-------------------------------|-----------------------------------|---------------------|
| <i>Barnacle goose</i>       |                                             |                               |                                   |                     |
| Single BG, improved grass   | -0.32                                       | 0.32                          | 0.33                              | -0.32               |
| Multiple BG, improved grass | <b>-0.38</b>                                | <b>0.36</b>                   | <b>0.36</b>                       | -0.43               |
| Single BG, rough grazing    | -0.19                                       | 0.14                          | 0.11                              | -0.12               |
| Multiple BG, shore grazing  | <b>-0.33</b>                                | 0.50                          | 0.34                              | -0.33               |
| <i>White fronted goose</i>  |                                             |                               |                                   |                     |
| Single WF, improved grass   | <b>-0.62</b>                                | <b>0.60</b>                   | 0.32                              | <b>-0.37</b>        |
| Multiple WF improved grass  | <b>-0.53</b>                                | <b>0.50</b>                   | 0.32                              | -0.26               |
| Single WF rough             | <b>-0.63</b>                                | <b>0.61</b>                   | 0.26                              | -0.30               |
| Multiple WF rough           | <b>-0.56</b>                                | <b>0.50</b>                   | <b>0.25</b>                       | -0.28               |

<sup>1</sup> Not at all risky = 1, Very risky =7

<sup>2</sup> Valence: Happy/Pleased =9, Unhappy/Annoyed =1

<sup>3</sup> Arousal: Calm/Relaxed = 1, Agitated/Irritated =9

<sup>4</sup> Not at all beneficial =1, Very beneficial =7

Table S5 Standardised linear coefficients and performance statistics of best performing models of barnacle goose risk-benefit distance. All combinations of nine predictor variables were considered, up to a maximum of five predictors per model. Models with  $\Delta AIC \leq 6$  and lower than simpler nested models were retained (Richards, 2015). The number of parameters in each model ( $K$ ), log-likelihood (LL),  $\Delta AIC$  and  $R^2$  are shown.

| Valence,<br>BG | Proportion<br>of income<br>from farm | Area<br>improved<br>grass | Trust,<br>NFU local | Trust,<br>RSPB local | $K$ | LL     | $\Delta AIC$ | $R^2$ |
|----------------|--------------------------------------|---------------------------|---------------------|----------------------|-----|--------|--------------|-------|
| -0.44          | 0.36                                 | -0.33                     | 0.21                | -0.31                | 7   | -50.48 | 0.00         | 0.49  |
| -0.50          | 0.35                                 | -0.29                     |                     | -0.25                | 6   | -52.08 | 1.21         | 0.45  |
| -0.59          | 0.37                                 | -0.25                     |                     |                      | 5   | -54.11 | 3.26         | 0.40  |
| -0.40          | 0.29                                 |                           |                     | -0.20                | 5   | -54.61 | 4.27         | 0.39  |
| -0.48          | 0.31                                 |                           |                     |                      | 4   | -55.84 | 4.73         | 0.36  |

Table S6 Standardised linear coefficients and performance statistics of best performing models of white-fronted goose risk-benefit distance. All combinations of eight predictor variables were considered, up to a maximum of five predictors per model. Models with  $\Delta AIC \leq 6$  and lower than simpler nested models were retained (Richards 2015). The number of parameters in each model ( $K$ ), log-likelihood (LL),  $\Delta AIC$  and  $R^2$  are shown.

| Valence,<br>WF | Proportion<br>of income<br>from farm | Area<br>improved<br>grass | Trust,<br>RSPB<br>local | $K$ | LL     | $\Delta AIC$ | $R^2$ |
|----------------|--------------------------------------|---------------------------|-------------------------|-----|--------|--------------|-------|
| -0.62          | 0.20                                 | -0.20                     | -0.26                   | 6   | -48.41 | 0.00         | 0.53  |
| -0.56          | 0.15                                 |                           | -0.22                   | 5   | -49.89 | 0.95         | 0.50  |
| -0.55          |                                      |                           | -0.25                   | 4   | -50.96 | 1.09         | 0.48  |
| -0.65          | 0.19                                 |                           |                         | 4   | -51.66 | 2.49         | 0.46  |
| -0.65          |                                      |                           |                         | 3   | -53.13 | 3.43         | 0.43  |

Table S7 Standardised linear coefficients and performance statistics of best performing models of desired reduction in barnacle goose damage. All combinations of ten predictor variables were considered, up to a maximum of five predictors per model. Models with  $\Delta AIC \leq 6$  and lower than simpler nested models were retained (Richards 2015). The number of parameters in each model ( $K$ ), log-likelihood (LL),  $\Delta AIC$  and  $R^2$  are shown.

| Arousal, BG | Proportion of income from farm | Trust, NFU local | Trust, SNH local | $K$ | LL     | $\Delta AIC$ | $R^2$ |
|-------------|--------------------------------|------------------|------------------|-----|--------|--------------|-------|
| 0.39        | 0.34                           | 0.30             | -0.22            | 6   | -40.53 | 0.00         | 0.49  |
| 0.46        | 0.31                           | 0.28             |                  | 5   | -42.10 | 1.15         | 0.45  |
| 0.44        | 0.32                           |                  | -0.19            | 5   | -43.51 | 3.96         | 0.41  |
| 0.50        | 0.30                           |                  |                  | 4   | -44.52 | 3.99         | 0.37  |
| 0.50        |                                | 0.26             |                  | 4   | -45.05 | 5.04         | 0.36  |

Table S8 Standardised linear coefficients and performance statistics of best performing models of desired barnacle goose harvest. All combinations of ten predictor variables were considered, up to a maximum of five predictors per model. Models with  $\Delta AIC \leq 6$  and lower than simpler nested models were retained (Richards 2015). The number of parameters in each model ( $K$ ), log-likelihood (LL),  $\Delta AIC$  and  $R^2$  are shown.

| Arousal, BG | Risk-benefit distance, BG | Trust, NFU local | $K$ | LL     | $\Delta AIC$ | $R^2$ |
|-------------|---------------------------|------------------|-----|--------|--------------|-------|
| 0.39        | 0.36                      | 0.30             | 5   | -35.91 | 0.00         | 0.64  |

## References

- Lang, P.J., Bradley, M.M. & Cuthbert, B.N. (2008). *International affective picture system (IAPS): Affective ratings of pictures and instruction manual. Technical Report A-8*. Gainesville, FL.
- Richards, S.A. (2015). Likelihood and model selection. In: *Ecol. Stat. Contemp. theory Appl.* (eds. Fox, G., Negrete-Yankelevich, S. & Sosa, V.). Oxford University Press, Oxford, UK., pp. 58–78.
